# Supplementary material for: Dynamic Variations in Fecal Bacterial Community and Fermentation Profile of Holstein Steers in Response to Three Stepwise Density Diets
Source: PubMed Central journal article supplement (PMC6719243; doi:10.3390/ani9080560), 2019-08-15
Supplement: animals-09-00560-s001.pdf [file animals-09-00560-s001.pdf]

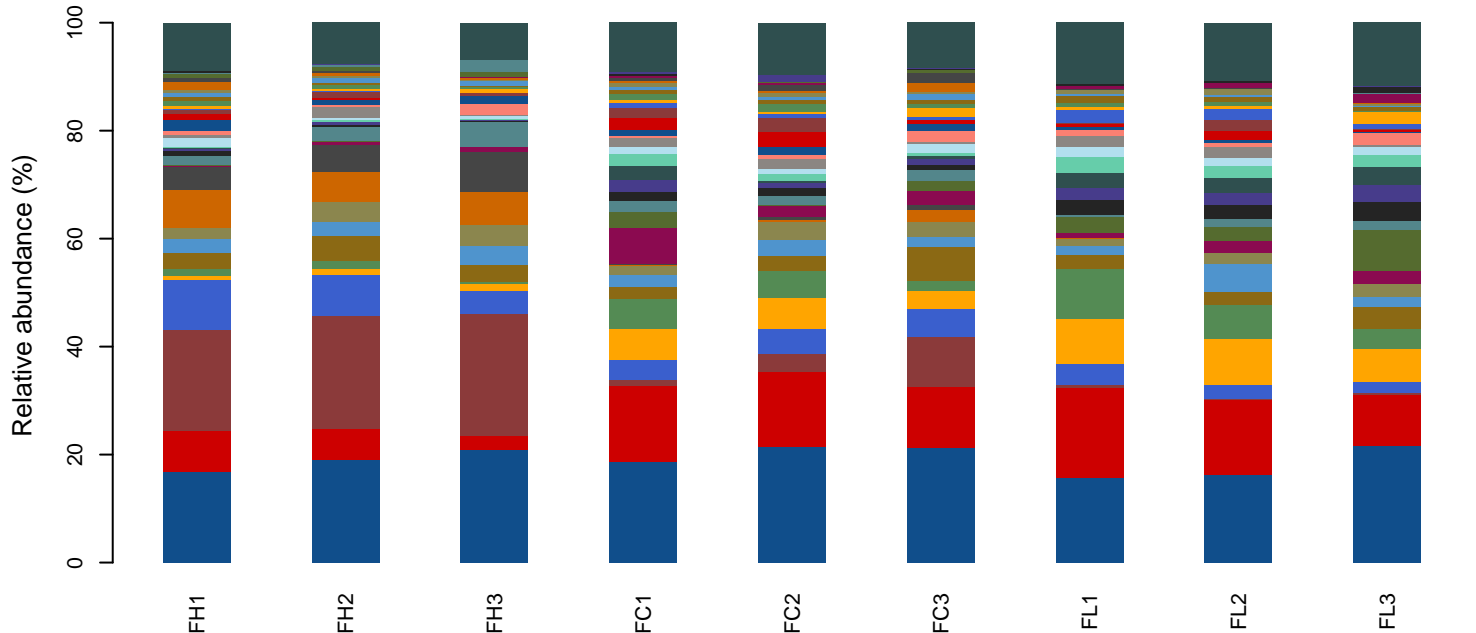

- |                                |                                        |                                    |
|--------------------------------|----------------------------------------|------------------------------------|
| g__unidentified                | g__Alloprevotella                      | g__Lachnoclostridium               |
| g__Ruminococcaceae_UCG-005     | g__Christensenellaceae_R-7_group       | g__Paeniclostridium                |
| g__Prevotella_9                | g__Eubacterium_coprostanoligenes_group | g__Parabacteroides                 |
| g__Succinivibrio               | g__Ruminococcaceae_UCG-013             | g__Ruminococcus_2                  |
| g__Rikenellaceae_RC9_gut_group | g__Ruminococcaceae_UCG-010             | g__Bifidobacterium                 |
| g__Bacteroides                 | g__Romboutsia                          | g__Ruminobacter                    |
| g__Clostridium_sensu_stricto_1 | g__Coprococcus_3                       | g__Akkermansia                     |
| g__Phascolarctobacterium       | g__Turicibacter                        | g__Roseburia                       |
| g__Prevotella_2                | g__Blautia                             | g__Subdoligranulum                 |
| g__Faecalibacterium            | g__Acetitomaculum                      | g__Ruminococcaceae_UCG-002         |
| g__Prevotellaceae_UCG-003      | g__Anaerostipes                        | g__Bacteroides_pectinophilus_group |
| g__Treponema_2                 | g__Alistipes                           | Other                              |
|                                | g__Coprococcus_1                       |                                    |
